# Supplementary material for: Rice Husk-Derived Cellulose Nanofibers: A Potential Sensor for Water-Soluble Gases
Source: MDPI journal article supplement (doi:10.3390/s21134415), 2021-06-28
Supplement: s1 [file s1]

# Supporting Information (SI)

## **Rice Husk-Derived Cellulose Nanofibers: A Potential Sensor for Water-Soluble Gases**

**Naresh Shahi<sup>1</sup>, Eunji Lee<sup>2</sup>, Byungjin Min<sup>3,\*</sup> and Dong-Joo Kim<sup>2,\*</sup>**

<sup>1</sup>College of Agriculture, Environment and Nutrition Sciences, Tuskegee University, Tuskegee, AL 36088 USA; nshahi1164@tuskegee.edu

<sup>2</sup>Department of Mechanical Engineering, Materials Research and Education Center, Auburn University, Auburn, AL 36849, USA; ezl0020@auburn.edu

<sup>3</sup>Department of Food and Nutritional Sciences, Tuskegee University, Tuskegee, AL 36088, USA

\*Correspondence: bmin@tuskegee.edu (B.M.); Tel.: +1(334)-727-8393 (B.M.); dkim@auburn.edu (D.-J.K.); Tel.: +1(334)-844-4864 (D.-J.K.)

**Table S1.** XRD data with samples corresponding to 2 theta values.

| Sample                                               | CrI (%) |
|------------------------------------------------------|---------|
| Cellulose nanofibers-rice husk (CNF)                 | 53.39   |
| TEMPO-Oxidized nanocellulose with glycerol (TOCNF/G) | 59.51   |
| TEMPO-oxidized nanocellulose (TOCNF)                 | 65.12   |

The crystallinity index (CrI) was determined based on the reflected intensity data using the following equation.

$$\text{CrI (\%)} = (I_{002} - I_{\text{am}}) / I_{002} \times 100$$

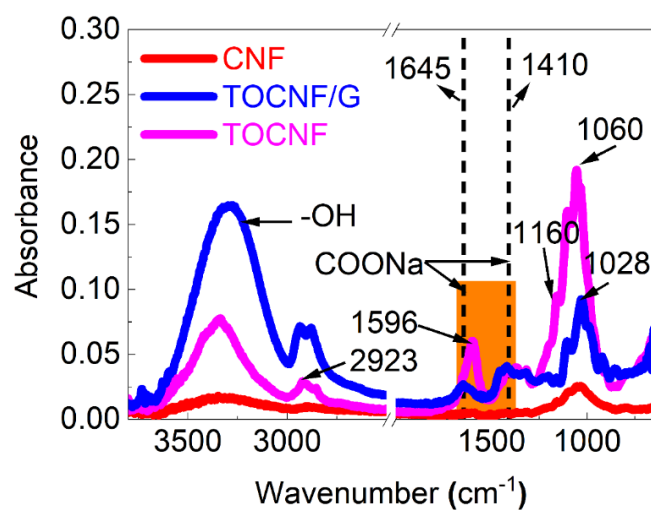

**Figure S1.** Comparative FTIR spectra of CNF, TEMPO-oxidized cellulose (TOCNF), and TOCNF with the addition of glycerol (TOCNF/G) in films. TOCNF/G has an intense peak around 3200-3300  $\text{cm}^{-1}$  and is associated with -OH groups and a unique peak around 1645 and 1410  $\text{cm}^{-1}$ ; these peaks are associated with sodium carboxylate groups of TOCNF and TOCNF/G.
